# Supplementary material for: Use of Cost-Effectiveness Thresholds in Healthcare Public Policy: Progress and Challenges
Source: PubMed Central journal article supplement — Appl Health Econ Health Policy. 2024 Jul 12;22(6):797–804. doi: 10.1007/s40258-024-00900-5 (PMC11470905; doi:10.1007/s40258-024-00900-5), 2024-07-12
Supplement: 40258_2024_900_MOESM1_ESM.pdf [file 40258_2024_900_MOESM1_ESM.pdf]

Table A.1: Articles and documents included in the revision

| Article                                                      | Country   | Estimates a CET from a supply-side approach? | Value of the CET            |
|--------------------------------------------------------------|-----------|----------------------------------------------|-----------------------------|
| Edney, Haji Ali Afzali, Cheng, and Karnon (2018)             | Australia | Yes                                          | AUD 28,033 per QALY gained. |
| George, Harris, and Mitchell (2001)                          | Australia | No                                           |                             |
| Health (2018)                                                | Australia | No                                           |                             |
| Henry, Hill, and Harris (2005)                               | Australia | No                                           |                             |
| A. S. Santos, Guerra-Junior, Godman, Morton, and Ruas (2018) | Brazil    | No                                           |                             |
| V. C. C. Santos (2010)                                       | Brazil    | No                                           |                             |
| Silva (2016)                                                 | Brazil    | No                                           |                             |
| Canadian Agency for Drugs and Technologies in Health (2017)  | Canada    | No                                           |                             |
| G. P. Marchildon, World Health Organization, et al. (2013)   | Canada    | No                                           |                             |
| G. Marchildon and Mou (2014)                                 | Canada    | No                                           |                             |
| Paris and Belloni (2014)                                     | Canada    | No                                           |                             |
| Rocchi, Menon, Verma, and Miller (2008)                      | Canada    | No                                           |                             |
| Board (2019)                                                 | Canada    | No                                           |                             |
| Griffiths and Vadlamudi (2016)                               | Canada    | No                                           |                             |
| Becerril-Montekio, Reyes, and Manuel (2011)                  | Chile     | No                                           |                             |
| Subsecretaría de Salud Pública (2013)                        | Chile     | No                                           |                             |
| Espinoza (2017)                                              | Chile     | No                                           |                             |
| Kuhn-Barrientos (2014)                                       | Chile     | No                                           |                             |
| Mascayano and Gajardo (2018)                                 | Chile     | No                                           |                             |
| Ministerio de Salud - Gobierno de Chile (2024)               | Chile     | No                                           |                             |
| Ministerio de Salud - Gobierno de Chile (2013)               | Chile     | No                                           |                             |
| Observatorio Chileno de Salud Pública (2019)                 | Chile     | No                                           |                             |

|                                                          |               |     |                                                                                                                                                                                                                                                                                                                                                                                                                                                       |
|----------------------------------------------------------|---------------|-----|-------------------------------------------------------------------------------------------------------------------------------------------------------------------------------------------------------------------------------------------------------------------------------------------------------------------------------------------------------------------------------------------------------------------------------------------------------|
| Butt, Liu, Kim, and Neumann (2019)                       | China         | No  | Review of CETs computed using demand-based methods.                                                                                                                                                                                                                                                                                                                                                                                                   |
| Chen, Zhang, Hu, and Hu (2023)                           | China         | No  |                                                                                                                                                                                                                                                                                                                                                                                                                                                       |
| Cai et al. (2021)                                        | China         | Yes | CET based on statistical value of life.                                                                                                                                                                                                                                                                                                                                                                                                               |
| Espinosa et al. (2022)                                   | Colombia      | Yes | The threshold is USD 4,487.5 per years of life lost avoided [14.7 million Colombian pesos (COP) at 2019 prices] and USD 5,180.8 per quality-adjusted life-years gained (17 million COP at 2019 prices).                                                                                                                                                                                                                                               |
| Congreso de la República de Colombia (1994)              | Colombia      | No  |                                                                                                                                                                                                                                                                                                                                                                                                                                                       |
| Defensoría del Pueblo (2014)                             | Colombia      | No  |                                                                                                                                                                                                                                                                                                                                                                                                                                                       |
| Guerrero, Gallego, Becerril-Montekio, and Vásquez (2011) | Colombia      | No  |                                                                                                                                                                                                                                                                                                                                                                                                                                                       |
| Ochalek, Lomas, and Claxton (2018)                       | Cross-country | Yes | The results from this approach to estimation using cross-country data can inform country-specific cost per DALY averted values by applying estimated elasticities to country-specific mortality rates, conditional life expectancies (CLEs) and population distribution (all by age and gender) as well as estimates of disability burden of disease and total healthcare expenditure.                                                                |
| Woods, Reville, Sculpher, and Claxton (2016)             | Cross-country | Yes | CETs for Malawi (the country with the lowest income in the world), Cambodia (with borderline low/low-middle income), El Salvador (with borderline low-middle/upper-middle income), and Kazakhstan (with borderline high-middle/high income) were estimated to be USD 3 to USD 116 (1%–51% GDP per capita), USD 44 to USD 518 (4%–51%), USD 422 to USD 1,967 (11%–51%), and USD 4,485 to USD 8,018 (32%–59%), respectively (2013 PPP-adjusted values). |
| Cameron, Ubels, and Norström (2018)                      | Cross-country | No  |                                                                                                                                                                                                                                                                                                                                                                                                                                                       |
| Eichler, Kong, Gerth, Mavros, and Jönsson (2004)         | Cross-country | No  |                                                                                                                                                                                                                                                                                                                                                                                                                                                       |
| Leech, Kim, Cohen, and Neumann (2018)                    | Cross-country | No  |                                                                                                                                                                                                                                                                                                                                                                                                                                                       |
| Neumann and Cohen (2017)                                 | Cross-country | No  |                                                                                                                                                                                                                                                                                                                                                                                                                                                       |
| A. S. Santos et al. (2018)                               | Cross-country | No  |                                                                                                                                                                                                                                                                                                                                                                                                                                                       |

|                                                          |                                                                                                                                                                                                                  |     |                                                                          |
|----------------------------------------------------------|------------------------------------------------------------------------------------------------------------------------------------------------------------------------------------------------------------------|-----|--------------------------------------------------------------------------|
| Paris, Devaux, and Wei (2010)                            | Cross-country: 29 OECD countries                                                                                                                                                                                 |     |                                                                          |
| Schwarzer et al. (2015)                                  | Cross-country: AHRQ/USA, BIQG-GOEG/Austria, CADTH/Canada, DAHTA@DIMDI/Germany, DECITC-GATS/Brazil, HAS/France, HITAP/Thailand, IQWiG/Germany, LBI-HTA/Austria, MSAC/Australia, NICE/England/Wales and SBU/Sweden | No  | Overview.                                                                |
| World Health Organization et al. (2015)                  | Cross-country: Asia                                                                                                                                                                                              | No  |                                                                          |
| Shiroiwa et al. (2010)                                   | Cross-country: Japan, ROK, Taiwan, UK, Australia, US                                                                                                                                                             | No  |                                                                          |
| Giedion et al. (2014)                                    | Cross-country: LATAM                                                                                                                                                                                             | No  |                                                                          |
| Elsisi et al. (2013)                                     | Egypt                                                                                                                                                                                                            | No  |                                                                          |
| Gericke, Britain, Elmahdawy, and Elsisi (2018)           | Egypt                                                                                                                                                                                                            | No  |                                                                          |
| Griffin et al. (2016)                                    | Egypt                                                                                                                                                                                                            | No  |                                                                          |
| Fouad, Elsisi, and Elmahdawy (2015)                      | Egypt                                                                                                                                                                                                            | No  |                                                                          |
| Fasseeh et al. (2022)                                    | Egypt                                                                                                                                                                                                            | No  |                                                                          |
| Claxton et al. (2015)                                    | England                                                                                                                                                                                                          | Yes | £ 12,936 per QALY gained (2008 expenditure, 2008-2010 mortality).        |
| Anderson et al. (2022)                                   | England                                                                                                                                                                                                          | No  |                                                                          |
| Appleby, Devlin, Parkin, Buxton, and Chalkidou (2009)    | England                                                                                                                                                                                                          | No  |                                                                          |
| Charlton (2020)                                          | England                                                                                                                                                                                                          | No  |                                                                          |
| Charlton (2022)                                          | England                                                                                                                                                                                                          | No  |                                                                          |
| Cylus et al. (2015)                                      | England                                                                                                                                                                                                          | No  |                                                                          |
| Devlin and Parkin (2004)                                 | England                                                                                                                                                                                                          | Yes | It analyzes the threshold between £ 20,000 and £ 30,000 per QALY gained. |
| McCabe, Claxton, and Culyer (2008)                       | England                                                                                                                                                                                                          | No  | It analyzes the threshold between £ 20,000 and £ 30,000 per QALY gained. |
| National Institute for Health and Care Excellence (2021) | England                                                                                                                                                                                                          | No  |                                                                          |

|                                                                  |              |     |                                                                                                                                                                                                                                                                         |
|------------------------------------------------------------------|--------------|-----|-------------------------------------------------------------------------------------------------------------------------------------------------------------------------------------------------------------------------------------------------------------------------|
| National Institute for Health and Care Excellence (2022)         | England      | No  |                                                                                                                                                                                                                                                                         |
| Kanavos, Manning, Taylor, Schurer, and Checchi (2010)            | England      | No  |                                                                                                                                                                                                                                                                         |
| Raftery (2014)                                                   | England      | No  |                                                                                                                                                                                                                                                                         |
| Sculpher, Claxton, and Pearson (2017)                            | England      | No  |                                                                                                                                                                                                                                                                         |
| O'Mahony and Coughlan (2016)                                     | Ireland      | No  |                                                                                                                                                                                                                                                                         |
| Lim, Shafie, Chua, and Hassali (2017)                            | Malaysia     | Yes | The CE thresholds established using the nonparametric Turnbull method ranged from MYR 12,810 to MYR 22,840 (USD 4,000–USD 7,000), whereas those estimated with the parametric interval regression model were between MYR 19,929 and MYR 28,470 (~ USD 6,200–USD 8,900). |
| Roza et al. (2019)                                               | Malaysia     | No  |                                                                                                                                                                                                                                                                         |
| van Baal et al. (2019)                                           | Netherlands  | Yes | € 41,000 per QALY gained.                                                                                                                                                                                                                                               |
| Stadhouders, Koolman, van Dijk, Jeurissen, and Adang (2019)      | Netherlands  | Yes | € 73,600 per QALY gained.                                                                                                                                                                                                                                               |
| Franken, Koopmanschap, and Steenhoek (2014)                      | Netherlands  | No  |                                                                                                                                                                                                                                                                         |
| Kroneman et al. (2016)                                           | Netherlands  | No  |                                                                                                                                                                                                                                                                         |
| Al-Jedai et al. (2023)                                           | Saudi Arabia | No  |                                                                                                                                                                                                                                                                         |
| Edoka and Stacey (2020)                                          | South Africa | Yes | ZAR 38,500 (USD 3,015) per DALY averted.                                                                                                                                                                                                                                |
| Barr (2022)                                                      | South Africa | No  |                                                                                                                                                                                                                                                                         |
| Edoka and Stacey (2022)                                          | South Africa | No  |                                                                                                                                                                                                                                                                         |
| Bernal-Delgado et al. (2018)                                     | Spain        | No  |                                                                                                                                                                                                                                                                         |
| De Cock, Miravittles, González-Juanatey, and Azanza-Perea (2007) | Spain        | Yes | A reasonable value would be in the range of € 30,000 to € 45,000 per QALY gained.                                                                                                                                                                                       |
| Vallejo-Torres, García-Lorenzo, and Serrano-Aguilar (2018)       | Spain        | Yes | A cost per QALY gained of between € 21,000 and € 24,000.                                                                                                                                                                                                                |
| Ministerio de Sanidad (2008)                                     | Spain        | No  |                                                                                                                                                                                                                                                                         |
| Teerawattananon, Tritasavit, Suchonwanich, and Kingkaew (2014)   | Thailand     | No  |                                                                                                                                                                                                                                                                         |

|                                                           |                |     |                                                                                                                                                                                                                                                                                                                                                        |
|-----------------------------------------------------------|----------------|-----|--------------------------------------------------------------------------------------------------------------------------------------------------------------------------------------------------------------------------------------------------------------------------------------------------------------------------------------------------------|
| Thavorncharoensap et al. (2013)                           | Thailand       | Yes | The mean WTP for a QALY value (WTP/QALY treatment) estimated by the TTO method ranged from BAHT 59,000 to BAHT 285,000 (16.49 BAHT = USD 1 purchasing power parity [PPP]). In contrast, the mean WTP for a QALY value in terms of prevention (WTP/QALYprevention) was significantly lower, ranging from BAHT 26,000 to BAHT 137,000.                   |
| Mohara et al. (2012)                                      | Thailand       | No  |                                                                                                                                                                                                                                                                                                                                                        |
| Youngkong (2014)                                          | Thailand       | No  |                                                                                                                                                                                                                                                                                                                                                        |
| Isaranuwachai et al. (2022)                               | Thailand       | No  |                                                                                                                                                                                                                                                                                                                                                        |
| Claxton et al. (2015)                                     | United Kingdom | Yes | £12,936 per QALY gained.                                                                                                                                                                                                                                                                                                                               |
| Weinstein (2008)                                          | United States  | No  |                                                                                                                                                                                                                                                                                                                                                        |
| Braithwaite, Meltzer, King Jr, Leslie, and Roberts (2008) | United States  | Yes | Lower and upper bounds are USD 183,000 and USD 264,000 per QALY gained.                                                                                                                                                                                                                                                                                |
| Bridges, Onukwugha, and Mullins (2010)                    | United States  | No  | It analyzes the USD 50,000 threshold per QALY gained.                                                                                                                                                                                                                                                                                                  |
| Chambers, Neumann, and Buxton (2010)                      | United States  | Yes | 20 were associated with an economic evaluation that estimated the intervention to be dominant (costs less and was more effective than the alternative), 12 with an incremental cost-effectiveness ratio (ICER) of less than USD 50,000, 8 with an ICER greater than USD 50,000 but less than USD 100,000, and 9 with an ICER greater than USD 100,000. |
| Grosse (2008)                                             | United States  |     | It analyzes the USD 50,000 threshold per QALY gained.                                                                                                                                                                                                                                                                                                  |
| Neumann, Cohen, Weinstein, et al. (2014)                  | United States  | No  | It analyzes the USD 50,000 threshold per QALY gained.                                                                                                                                                                                                                                                                                                  |
| Rice, Rosenau, Unruh, and Barnes (2020)                   | United States  | No  |                                                                                                                                                                                                                                                                                                                                                        |
| Sullivan, Watkins, Sweet, and Ramsey (2009)               | United States  | No  |                                                                                                                                                                                                                                                                                                                                                        |
| Vanness, Lomas, and Ahn (2021)                            | United States  | Yes | USD 104,000 per QALY gained (95% UI: USD 51,000 - USD 209,000)                                                                                                                                                                                                                                                                                         |

## References

- Al-Jedai, A. H., Lomas, J., Almudaiheem, H. Y., Al-Ruthia, Y. S. H., Alghamdi, S., Awad, N., ... others (2023). Informing a cost-effectiveness threshold for saudi arabia. *Journal of Medical Economics*, 26(1), 128–138.
- Anderson, M., Pitchforth, E., Edwards, N., Alderwick, H., McGuire, A., Mossialos, E., et al. (2022). United kingdom: health system review.
- Appleby, J., Devlin, N., Parkin, D., Buxton, M., & Chalkidou, K. (2009). Searching for cost effectiveness thresholds in the nhs. *Health policy*, 91(3), 239–245.

- Barr, G. (2022). Estimating a cost-effectiveness threshold for health care decision-making in south africa—a commentary. *Health Policy and Planning*, 37(8), 1066–1069.
- Becerril-Montekio, V., Reyes, J. d. D., & Manuel, A. (2011). Sistema de salud de chile. *Salud pública de México*, 53, s132–s142.
- Bernal-Delgado, E., García-Armesto, S., Oliva, J., Sánchez Martínez, F. I., Repullo, J. R., Peña-Longobardo, L. M., ... others (2018). Spain: health system review.
- Board, T. P. M. P. R. (2019). *Pmprb framework modernization - proposed application of pe and market size factors to category 1 drugs*. Retrieved from <http://www.pmprb-cepmb.gc.ca/view.asp?ccid=1420&lang=en>
- Braithwaite, R. S., Meltzer, D. O., King Jr, J. T., Leslie, D., & Roberts, M. S. (2008). What does the value of modern medicine say about the \$50,000 per quality-adjusted life-year decision rule? *Medical care*, 349–356.
- Bridges, J. F., Onukwugha, E., & Mullins, C. D. (2010). Healthcare rationing by proxy: cost-effectiveness analysis and the misuse of the \$50 000 threshold in the us. *Pharmacoeconomics*, 28, 175–184.
- Butt, T., Liu, G. G., Kim, D. D., & Neumann, P. J. (2019). Taking stock of cost-effectiveness analysis of healthcare in China. *BMJ global health*, 4(3), e001418.
- Cai, D., Shi, S., Jiang, S., Si, L., Wu, J., & Jiang, Y. (2021). Estimation of the cost-effective threshold of a quality-adjusted life year in China based on the value of statistical life. *The European Journal of Health Economics*, 1–9.
- Cameron, D., Ubels, J., & Norström, F. (2018). On what basis are medical cost-effectiveness thresholds set? clashing opinions and an absence of data: a systematic review. *Global health action*, 11(1), 1447828.
- Canadian Agency for Drugs and Technologies in Health. (2017). *Guidelines for the economic evaluation of health technologies: Canada*. Retrieved from [https://www.cadth.ca/sites/default/files/pdf/guidelines\\_for\\_the\\_economic\\_evaluation\\_of\\_health\\_technologies\\_canada\\_4th\\_ed.pdf](https://www.cadth.ca/sites/default/files/pdf/guidelines_for_the_economic_evaluation_of_health_technologies_canada_4th_ed.pdf).
- Chambers, J. D., Neumann, P. J., & Buxton, M. J. (2010). Does medicare have an implicit cost-effectiveness threshold? *Medical Decision Making*, 30(4), E14–E27.
- Charlton, V. (2020). Nice and fair? health technology assessment policy under the uk’s national institute for health and care excellence, 1999–2018. *Health Care Analysis*, 28(3), 193–227.
- Charlton, V. (2022). Justice, transparency and the guiding principles of the uk’s national institute for health and care excellence. *Health Care Analysis*, 30(2), 115–145.
- Chen, W., Zhang, L., Hu, M., & Hu, S. (2023). Use of health technology assessment in drug reimbursement decisions in China. *bmj*, 381.
- Claxton, K., Martin, S., Soares, M., Rice, N., Spackman, E., Hinde, S., ... Sculpher, M. (2015). Methods for the estimation of the national institute for health and care excellence cost-effectiveness threshold. *Health Technology Assessment (Winchester, England)*, 19(14), 1.
- Congreso de la República de Colombia. (1994). *Ley 100 de 1993*. Retrieved from [http://www.secretariassenado.gov.co/senado/basedoc/ley\\_0100\\_1993.html](http://www.secretariassenado.gov.co/senado/basedoc/ley_0100_1993.html)
- Cylus, J., Richardson, E., Findley, L., Longley, M., O’Neill, C., Steel, D., ... others (2015). United kingdom: health system review.
- De Cock, E., Miravittles, M., González-Juanatey, J. R., & Azanza-Perea, J. R. (2007). Valor umbral del coste por año de vida ganado para recomendar la adopción de tecnologías sanitarias en españa: evidencias procedentes de una revisión de la literatura. *Pharmacoeconomics Spanish Research Articles*, 4, 97–107.
- Defensoría del Pueblo. (2014). *La tutela y los derechos a la salud y a la seguridad social 2013*.
- Devlin, N., & Parkin, D. (2004). Does nice have a cost-effectiveness threshold and what other factors influence its decisions? a binary choice analysis. *Health economics*, 13(5), 437–452.
- Edney, L. C., Haji Ali Afzali, H., Cheng, T. C., & Karnon, J. (2018). Estimating the reference incremental cost-effectiveness ratio for the Australian health system. *Pharmacoeconomics*, 36, 239–252.
- Edoka, I., & Stacey, N. (2020). Estimating a cost-effectiveness threshold for health care decision-making in south africa. *Health Policy and Planning*, 35(5), 546–555.
- Edoka, I., & Stacey, N. (2022). Response to a commentary by barr (2022) on edoka and stacey (2020) estimating a cost-effectiveness threshold for healthcare decision-making in south africa. *Health Policy and Planning*, 37(8), 1070–1073.
- Eichler, H.-G., Kong, S. X., Gerth, W. C., Mavros, P., & Jönsson, B. (2004). Use of cost-effectiveness analysis in health-care resource allocation decision-making: how are cost-effectiveness thresholds expected to emerge? *Value in health*, 7(5), 518–528.
- Elsisi, G. H., Kaló, Z., Eldessouki, R., Elmahdawy, M. D., Saad, A., Ragab, S., ... Abaza, S. (2013).

- Recommendations for reporting pharmacoeconomic evaluations in egypt. *Value in health regional issues*, 2(2), 319–327.
- Espinosa, O., Rodríguez-Lesmes, P., Orozco, L., Ávila, D., Enríquez, H., Romano, G., & Ceballos, M. (2022). Estimating cost-effectiveness thresholds under a managed healthcare system: experiences from colombia. *Health Policy and Planning*, 37(3), 359–368.
- Espinoza, M. A. (2017). Evaluación económica para ia toma de decisiones sobre cobertura en salud:¿ qué debe saber el profesional de la salud? *Revista chilena de cardiología*, 36(2), 144–153.
- Fasseeh, A., Elezbawy, B., Korra, N., Sedrak, A., Kirollos, M., Eldessouki, R., ... others (2022). Posb205 framework for implementing cost-effectiveness thresholds in egypt. *Value in Health*, 25(1), S145.
- Fouad, S., Elsisí, G., & Elmahdawy, M. (2015). Economic evaluation of transarterial chemoembolization with lipiodol versus drug eluting bead for the treatment of hepatocellular carcinoma in egyptian patients. *Value in Health*, 18(3), A205–A206.
- Franken, M., Koopmanschap, M., & Steenhoek, A. (2014). Health economic evaluations in reimbursement decision making in the netherlands: time to take it seriously? *Zeitschrift für Evidenz, Fortbildung und Qualität im Gesundheitswesen*, 108(7), 383–389.
- George, B., Harris, A., & Mitchell, A. (2001). Cost-effectiveness analysis and the consistency of decision making: evidence from pharmaceutical reimbursement in Australia (1991 to 1996). *Pharmacoeconomics*, 19, 1103–1109.
- Gericke, C. A., Britain, K., Elmahdawy, M., & Elsisí, G. (2018). Health system in egypt.
- Giedion, U., Bitrán, R., Tristao, I., En, C., Fuente Proporciónada Por, L., et al. (2014). Planes de beneficios en salud de américa latina. *Health Benefit Plans in Latin America (Spanish: Planes de beneficios en salud de América Latina)*.
- Griffin, A., Elsisí, G., Ragab, S., Ziada, R., Aboushady, R., Abdelgawad, S., ... Ashraf, R. (2016). Setting recommendations for good practice of health technology assessment in the egyptian ministry of health. *Value in Health*, 19(7), A497.
- Griffiths, E., & Vadlamudi, N. K. (2016). Cadth’s \$50,000 cost-effectiveness threshold: fact or fiction? *Value in Health*, 19(7), A488–A489.
- Grosse, S. D. (2008). Assessing cost-effectiveness in healthcare: history of the \$50,000 per qaly threshold. *Expert review of pharmacoeconomics & outcomes research*, 8(2), 165–178.
- Guerrero, R., Gallego, A. I., Becerril-Montekio, V., & Vásquez, J. (2011). Sistema de salud de colombia. *Salud pública de México*, 53, s144–s155.
- Health, A. (2018). *The Australian health system, Australian government department of health*.
- Henry, D. A., Hill, S. R., & Harris, A. (2005). Drug prices and value for money: the Australian pharmaceutical benefits scheme. *Jama*, 294(20), 2630–2632.
- Isaranuwatthai, W., Nakamura, R., Wee, H. L., Sarajan, M. H., Wang, Y., Soboon, B., ... others (2022). What are the impacts of increasing cost-effectiveness threshold? a protocol on an empirical study based on economic evaluations conducted in thailand. *Plos one*, 17(10), e0274944.
- Kanavos, P., Manning, J., Taylor, D., Schurer, W., & Checchi, K. (2010). Implementing value-based pricing for pharmaceuticals in the uk. *London: 2020health*.
- Kroneman, M., Boerma, W., van den Berg, M., Groenewegen, P., de Jong, J., van Ginneken, E., ... others (2016). Netherlands: health system review.
- Kuhn-Barrientos, L. (2014). Health technology assessment: conceptual framework and international perspective. *Revista Médica De Chile*, 142, S11–5.
- Leech, A. A., Kim, D. D., Cohen, J. T., & Neumann, P. J. (2018). Use and misuse of cost-effectiveness analysis thresholds in low-and middle-income countries: trends in cost-per-daly studies. *Value in Health*, 21(7), 759–761.
- Lim, Y. W., Shafie, A. A., Chua, G. N., & Hassali, M. A. A. (2017). Determination of cost-effectiveness threshold for health care interventions in malaysia. *Value in Health*, 20(8), 1131–1138.
- Marchildon, G., & Mou, H. (2014). A needs-based allocation formula for canada health transfer. *Canadian Public Policy*, 40(3), 209–223.
- Marchildon, G. P., World Health Organization, et al. (2013). Canada: Health system review.
- Mascayano, F., & Gajardo, J. (2018). Implementation science to evaluate health programs and services. *Revista médica de Chile*, 146(7), 945–946.
- McCabe, C., Claxton, K., & Culyer, A. J. (2008). The nice cost-effectiveness threshold: what it is and what that means. *Pharmacoeconomics*, 26, 733–744.
- Ministerio de Salud - Gobierno de Chile. (2013). *Propuesta de un modelo de implementación e institucional-*

- ización de la evaluación de tecnologías sanitarias en Chile.
- Ministerio de Salud - Gobierno de Chile. (2024). *Etesa objetivos*.
- Ministerio de Sanidad. (2008). *Sistema nacional de salud España*.
- Mohara, A., Youngkong, S., Velasco, R. P., Werayingyong, P., Pachanee, K., Prakongsai, P., ... others (2012). Using health technology assessment for informing coverage decisions in thailand. *Journal of comparative effectiveness research*, 1(2), 137–146.
- National Institute for Health and Care Excellence. (2021). *Nice strategy 2021 to 2026 - dynamic, collaborative, excellent*.
- National Institute for Health and Care Excellence. (2022). *Nice health technology evaluations: the manual*.
- Neumann, P. J., & Cohen, J. T. (2017). Icer’s revised value assessment framework for 2017–2019: a critique. *Pharmacoeconomics*, 35, 977–980.
- Neumann, P. J., Cohen, J. T., Weinstein, M. C., et al. (2014). Updating cost-effectiveness—the curious resilience of the \$50,000-per-qaly threshold. *N Engl J Med*, 371(9), 796–797.
- Observatorio Chileno de Salud Pública. (2019). *Desarrollo histórico del sistema de salud*. Retrieved from <http://www.ochisap.cl/index.php/organizacion-y-estructura-del-sistema-de-salud/desarrollo-historico-del-sistema-de-salud>
- Ochalek, J., Lomas, J., & Claxton, K. (2018). Estimating health opportunity costs in low-income and middle-income countries: a novel approach and evidence from cross-country data. *BMJ global health*, 3(6).
- O’Mahony, J. F., & Coughlan, D. (2016). The irish cost-effectiveness threshold: does it support rational rationing or might it lead to unintended harm to ireland’s health system? *Pharmacoeconomics*, 34, 5–11.
- Paris, V., & Belloni, A. (2014). Value in pharmaceutical pricing—country profile: Canada. *OECD Heal Work Pap*, 63, 1–74.
- Paris, V., Devaux, M., & Wei, L. (2010). Health systems institutional characteristics: a survey of 29 oecd countries.
- Raftery, J. (2014). Nice’s cost-effectiveness range: should it be lowered? *PharmacoEconomics*, 32(7), 613–615.
- Rice, T., Rosenau, P., Unruh, L. Y., & Barnes, A. J. (2020). United states: Health system review. *Health systems in transition*, 22(4), 1–441.
- Rocchi, A., Menon, D., Verma, S., & Miller, E. (2008). The role of economic evidence in canadian oncology reimbursement decision-making: to lambda and beyond. *Value in Health*, 11(4), 771–783.
- Roza, S., Junainah, S., Izzuna, M. M. G., Nurhasni, K. A. R. K., Yusof, M. A. M., Noormah, M. D., ... Wai, L. S. (2019). Health technology assessment in malaysia: past, present, and future. *International journal of technology assessment in health care*, 35(6), 446–451.
- Santos, A. S., Guerra-Junior, A. A., Godman, B., Morton, A., & Ruas, C. M. (2018). Cost-effectiveness thresholds: methods for setting and examples from around the world. *Expert review of pharmacoeconomics & outcomes research*, 18(3), 277–288.
- Santos, V. C. C. (2010). *As análises econômicas na incorporação de tecnologias em saúde: reflexões sobre a experiência brasileira*.
- Schwarzer, R., Rochau, U., Saverno, K., Jahn, B., Bornschein, B., Muehlberger, N., ... others (2015). Systematic overview of cost-effectiveness thresholds in ten countries across four continents. *Journal of comparative effectiveness research*, 4(5), 485–504.
- Sculpher, M., Claxton, K., & Pearson, S. D. (2017). Developing a value framework: the need to reflect the opportunity costs of funding decisions. *Value in Health*, 20(2), 234–239.
- Shiroiwa, T., Sung, Y.-K., Fukuda, T., Lang, H.-C., Bae, S.-C., & Tsutani, K. (2010). International survey on willingness-to-pay (wtp) for one additional qaly gained: what is the threshold of cost effectiveness? *Health economics*, 19(4), 422–437.
- Silva, A. (2016). *Entendendo a incorporação de tecnologias em saúde no sus: como se envolver*. Retrieved from [http://bvsmms.saude.gov.br/bvs/publicacoes/entendendo\\_incorporacao\\_tecnologias\\_sus\\_envolver.pdf](http://bvsmms.saude.gov.br/bvs/publicacoes/entendendo_incorporacao_tecnologias_sus_envolver.pdf).
- Stadhouders, N., Koolman, X., van Dijk, C., Jeurissen, P., & Adang, E. (2019). The marginal benefits of healthcare spending in the netherlands: Estimating cost-effectiveness thresholds using a translog production function. *Health economics*, 28(11), 1331–1344.
- Subsecretaría de Salud Pública . (2013). Guía metodológica para la evaluación económica de intervenciones en salud en Chile.



- Sullivan, S. D., Watkins, J., Sweet, B., & Ramsey, S. D. (2009). Health technology assessment in health-care decisions in the united states. *Value in Health*, *12*, S39–S44.
- Teerawattananon, Y., Tritasavit, N., Suchonwanich, N., & Kingkaew, P. (2014). The use of economic evaluation for guiding the pharmaceutical reimbursement list in thailand. *Zeitschrift für Evidenz, Fortbildung und Qualität im Gesundheitswesen*, *108*(7), 397–404.
- Thavorncharoensap, M., Teerawattananon, Y., Natanant, S., Kulpeng, W., Yothasamut, J., & Werayingyong, P. (2013). Estimating the willingness to pay for a quality-adjusted life year in thailand: does the context of health gain matter? *ClinicoEconomics and outcomes research*, 29–36.
- Vallejo-Torres, L., García-Lorenzo, B., & Serrano-Aguilar, P. (2018). Estimating a cost-effectiveness threshold for the spanish nhs. *Health economics*, *27*(4), 746–761.
- van Baal, P., Perry-Duxbury, M., Bakx, P., Versteegh, M., Van Doorslaer, E., & Brouwer, W. (2019). A cost-effectiveness threshold based on the marginal returns of cardiovascular hospital spending. *Health economics*, *28*(1), 87–100.
- Vanness, D. J., Lomas, J., & Ahn, H. (2021). A health opportunity cost threshold for cost-effectiveness analysis in the united states. *Annals of internal medicine*, *174*(1), 25–32.
- Weinstein, M. C. (2008). *How much are americans willing to pay for a quality-adjusted life year?* (Vol. 46) (No. 4). LWW.
- Woods, B., Revill, P., Sculpher, M., & Claxton, K. (2016). Country-level cost-effectiveness thresholds: initial estimates and the need for further research. *Value in Health*, *19*(8), 929–935.
- World Health Organization, et al. (2015). Factors conducive to the development of health technology assessment in asia: impacts and policy options.
- Youngkong, S. (2014). Application of hta research on policy decision-making. *Journal of the Medical Association of Thailand= Chotmaihet thangkaet*, *97*, S119–26.
